# Supplementary material for: CacaoFIT: the network of cacao field trials in Latin America and its contribution to sustainable cacao farming in the region
Source: Frontiers journal article supplement (doi:10.3389/fsufs.2024.1370275), 2024-07-12
Supplement: Data_Sheet_1.docx [file Data_Sheet_1.docx]

Supplementary Material. List of researchers, lecturers and practitioners included in the CacaoFIT network in Latin America, 2023.

| **Country** | **Contact person** | **Institution** | **Website/email** |
| --- | --- | --- | --- |
| MXc | Julián Pérez Flores ([julianflores@colpos.mx](mailto:julianflores@colpos.mx)) | Colegio de postgraduados (COLPOS) | [www.colpos.mx/cp](http://www.colpos.mx/cp) |
| Alfonso Azpeitia Morales ([azpeitia.alfonso@inifap.gob.mx](mailto:azpeitia.alfonso@inifap.gob.mx)) | INIFAP | <https://www.gob.mx/inifap> |
| Lorena Soto-Pinto ([lsoto@ecosur.mx](mailto:lsoto@ecosur.mx)) | Colegio de la Frontera Sur (ECOSUR) | <https://www.ecosur.mx/> |
| Maricela Salgado-Mora ([msalgado@unach.mx](mailto:msalgado@unach.mx)) | Universidad Autónoma de Chiapas, Campus IV | <https://www.unach.mx/> |
| DR | Olivier Dehuevels ([olivier.deheuvels@cirad.fr](mailto:olivier.deheuvels@cirad.fr)) & Martin Notaro ([martin.notaro@cirad.fr](mailto:martin.notaro@cirad.fr)) | CIRAD-CEDAF/CacaoForests | [www.cacaoforest.org](http://www.cacaoforest.org) |
| Enelvi Brito Sosa ([britososae@gmail.com](mailto:britososae@gmail.com)) & Jaime H. Gómez ([jgomez@conacado.com](mailto:jgomez@conacado.com)) | CATIE-Kolfaci-MAG | <https://conacado.com.do> |
| GUA | Leopoldo Calel Mus ([polocalel@gmail.com](mailto:polocalel@gmail.com)) | ICTA | [www.icta.gob.gt](http://www.icta.gob.gt) |
| Aroldo García ([argarcia@icta.gob.gt](mailto:argarcia@icta.gob.gt)) |
| Julio Pérez Siquinajay ([julpe221@hotmail.com](mailto:julpe221@hotmail.com)) | USAC, Finca Bulbuxya | <http://fausac.gt/> |
| SAL | Eufemia Segura Magaña ([eufemia.segura@centa.gob.sv](mailto:eufemia.segura@centa.gob.sv)) | CENTA-MAG | <https://www.centa.gob.sv/> |
| HON | Oscar Ramírez Argueta ([oscar_ramirez@fhia-hn.org](mailto:oscar_ramirez@fhia-hn.org)) & Javier Diaz Matute ([javier_diaz@fhia-hn.org](mailto:javier_diaz@fhia-hn.org)) | FHIA | [www.fhia.org.hn](http://www.fhia.org.hn) |
| Leslie Janeth Salgado (l[eslie.salgado@sag.gob.hn](mailto:eslie.salgado@sag.gob.hn)) | Secretaria Técnica de Agricultura (SAG) | <https://sag.gob.hn/> |
| NIC | Sophya Reyes ([sophya.reyes@fundacionnicafrance.org](mailto:sophya.reyes@fundacionnicafrance.org)) & Melanie Bordeaux ([research@fundacionnicafrance.org](mailto:research@fundacionnicafrance.org)) | ECOM/Fundación NicaFrance | [www.fundacionnicafrance.org](http://www.fundacionnicafrance.org) |
| Roger Bolaños Taleno ([regorbt@gmail.com](mailto:regorbt@gmail.com)) & María Jiménez López ([mcrisjimenezl@yahoo.com](mailto:mcrisjimenezl@yahoo.com)) | Instituto Nacional de Tecnología Agropecuaria (INTA) | [www.inta.gob.ni](http://www.inta.gob.ni) |
| CR | Arlene López Sampson ([lopeza@catie.ac.cr](mailto:lopeza@catie.ac.cr)), Rolando H. Cerda ([rcerda@catie.ac.cr](mailto:rcerda@catie.ac.cr)), Eduardo Somarriba ([esomarri@catie.ac.cr](mailto:esomarri@catie.ac.cr)), Fernado Casanoves ([fcasanoves@catie.ac.cr](mailto:fcasanoves@catie.ac.cr)). | CATIE | [www.catie.ac.cr](http://www.catie.ac.cr) |
| Luis Pocasangre Enamorado ([lpocasangre@earth.ac.cr](mailto:lpocasangre@earth.ac.cr)) | EARTH University | [www.earth.ac.cr](http://www.earth.ac.cr) |
| Rocio Fallas Salas ([rfallas@mag.go.cr](mailto:rfallas@mag.go.cr)) | Ministerio de Agricultura y Ganadería-Enlace KoLFACI | [www.inta.go.cr/](http://www.inta.go.cr/) |
| PAN | Luis López ([llopez@mida.gob.pa](mailto:llopez@mida.gob.pa)) | Ministerio de Desarrollo Agropecuario- Enlace KoLFACI | <https://mida.gob.pa> |
| Eduardo Somarriba ([esomarri@catie.ac.cr](mailto:esomarri@catie.ac.cr)) | Proyecto GIZ-CATIE | [www.catie.ac.cr](http://www.catie.ac.cr) |
| COL | Eliana Báez Daza ([ebaez@agrosavia.co](mailto:ebaez@agrosavia.co)), Yeirme Jaimes Suarez ([yjaimes@agrosavia.co](mailto:yjaimes@agrosavia.co)), Argeni Mora Garces ([amora@agrosavia.co](mailto:amora@agrosavia.co)) | Agrosavia | [www.agrosavia.co](http://www.agrosavia.co) |
| Jairo Rojas Molina ([jrojas@agrosavia.co](mailto:jrojas@agrosavia.co)) & Genaro Agudelo Castaneda ([gagudelo@agrosavia.co](mailto:gagudelo@agrosavia.co)) | CATIE-Kolfaci-Agrosavia |
| Juan C. Salazar Suarez ([Ju.suarez@udla.edu.co](mailto:Ju.suarez@udla.edu.co)) | Universidad de la Amazonia | [www.uniamazonia.edu.co](http://www.uniamazonia.edu.co) |
| Omar Domínguez ([omar.dominguez@fedecacao.com.co](mailto:omar.dominguez@fedecacao.com.co)) & Paula Arenas ([paula.arenas@fedecacao.com.co](mailto:paula.arenas@fedecacao.com.co)) | Federación de cacaoteros de Colombia (FEDECACAO) | <https://www.fedecacao.com.co/> |
| VEN | Osmary Araque ([osmarydeleon@gmail.com](mailto:osmarydeleon@gmail.com)) | Universidad de los Andes | [www.ula.ve](http://www.ula.ve) |
| ECU | Ramon E. Jaimez ([ramon.jaimez@utm.edu.ec](mailto:ramon.jaimez@utm.edu.ec)) | Universidad Técnica de Manabí | [www.utm.edu.ec](http://www.utm.edu.ec) |
| Geover Pena Monserrate ([geover.pena@iniap.gob.ec](mailto:geover.pena@iniap.gob.ec)**)** | Instituto Nacional de Investigaciones Agropecuarias (INIAP) | [www.iniap.gob.ec](http://www.iniap.gob.ec) |
| Líder Tinoco ([leider.tinoco@iniap.gob.ec](mailto:leider.tinoco@iniap.gob.ec)) |
| Carlos E. Caidedo ([carlos.caicedo@iniap.gob.ec](mailto:carlos.caicedo@iniap.gob.ec)) |
| BOL | Johanna Ruegg ([johanna.rueegg@fibl.org](mailto:johanna.rueegg@fibl.org)) & Stephane Saj ([stephane.saj@fibl.org](mailto:stephane.saj@fibl.org)) | FiBL | <https://systems-comparison.fibl.org/> |
| Joaquin Milz ([j.milz@ecotop-consult.de](mailto:j.milz@ecotop-consult.de)) & Ulf Schneidewind ([ulf.s@ecotop-consult.de](mailto:ulf.s@ecotop-consult.de)) | Fundación ECOTOP | [www.ecotop-consult.de](http://www.ecotop-consult.de) |
| PER | Cesar Arévalo Hernández ([cesar.arevaloh@gmail.com](mailto:cesar.arevaloh@gmail.com)) & Enrique Arévalo Gardini ([enriquearevaloga@gmail.com](mailto:enriquearevaloga@gmail.com)) | Instituto de Cultivo Tropicales (ICT) | [www.ict.org.pe/](https://www.ict.org.pe/) |
| Victor Johnson Vargas ([vvargasc@inia.gob.pe](mailto:vvargasc@inia.gob.pe)) | Instituto Nacional de Investigación Agropecuaria (INIA) | [www.gob.pe/inia](http://www.gob.pe/inia) |
| Luis Amaringo ([lamaringo@inia.gob.pe](mailto:lamaringo@inia.gob.pe)) |  |
| T & | Pathmanathan Umaharan ([Pathmanathan.Umaharan@sta.uwi.edu](mailto:Pathmanathan.Umaharan@sta.uwi.edu)), Gideon Ramtahal ([Gideon.Ramtahal@sta.uwi.edu](mailto:Gideon.Ramtahal@sta.uwi.edu)) & Anelle Holder-John ([Annelle.Holder@sta.uwi.edu](mailto:Annelle.Holder@sta.uwi.edu)) | Cocoa Research Center-CRC | <https://sta.uwi.edu/cru/> |
| BRA | Antonio Gama-Rodrigues &Emmanuela Gama-Rodrigues ([tonygama@uenf.br](mailto:tonygama@uenf.br) and [emanuela@uenf.br](mailto:emanuela@uenf.br)) | Universidade Estadual do Norte Fluminense Darcy Ribeiro (UENF - Laboratório de Solos), RJ, Brasil | <https://uenf.br/portal/> |
| Manfred Willy Muller ([mwmuller06@gmail.com](mailto:mwmuller06@gmail.com)) & Fernando Antonio Texeira Mendes ([fernando@ufpa.br](mailto:fernando@ufpa.br)) | CEPLAC/MAPA - Comissão Executiva do Plano da Lavoura Cacaueira/Ministério da Agricultura, Pecuária e Abastecimento, Brasília. | <https://www.gov.br/agricultura/pt-br/assuntos/ceplac> |
